# Supplementary material for: The genetic mating system of a sea spider with male-biased sexual size dimorphism: evidence for paternity skew despite random mating success
Source: PubMed Central journal article supplement — Behav Ecol Sociobiol. 2011 Mar 12;65(8):1595–604. doi: 10.1007/s00265-011-1170-x (PMC3134710; doi:10.1007/s00265-011-1170-x), 2011-03-12
Supplement: 265_2011_1170_MOESM1_ESM.pdf [file 265_2011_1170_MOESM1_ESM.pdf]

Table S1. Deduced genetic parentage for embryos carried by 45 male *Ammothella biunguiculata* based on five polymorphic microsatellite loci. Egg clusters are labeled according to their relative position along each oviger [e.g. L1 is the most proximal cluster on the left (L) oviger]. Dams with designation 'F' indicate deduced dams whose genotypes perfectly matched those of collected females, and hence the female I.D.'s are given. Deduced genotypes for which no matches were found among collected females are represented by 'D'. Dams that mated with more than one male are marked with number superscripts. Also shown are probabilities of spurious identity for deduced dam genotypes that matched those of collected females or that were detected in multiple clusters.

| Male I.D. | Egg cluster | No. of progeny in cluster | Deduced dam I.D.  | Probability of identity |
|-----------|-------------|---------------------------|-------------------|-------------------------|
| M1        | L1          | 65                        | F9                | $3.9 \times 10^{-12}$   |
| "         | R1          | 108                       | D1                |                         |
| "         | R2          | 118                       | F2 <sup>1</sup>   | $3.3 \times 10^{-9}$    |
| M2        | L1          | 33                        | F7 <sup>2</sup>   | $3.1 \times 10^{-9}$    |
| M3        | R1          | 100                       | F7 <sup>2</sup>   | "                       |
| M4        | L1          | 75                        | F2 <sup>1</sup>   | $3.3 \times 10^{-9}$    |
| "         | R1          | 51                        | F2 <sup>1</sup>   | "                       |
| M5        | L1          | 33                        | D2                |                         |
| "         | R1          | 47                        | F5                | $1.1 \times 10^{-7}$    |
| M6        | L1          | 28                        | D3                |                         |
| "         | R1          | 85                        | F30 <sup>3</sup>  | $4.0 \times 10^{-9}$    |
| M7        | L1          | 45                        | D4 <sup>4</sup>   | $1.7 \times 10^{-10}$   |
| "         | R1          | 42                        | D4 <sup>4</sup>   | "                       |
| "         | R2          | 30                        | F34 <sup>5</sup>  | $5.7 \times 10^{-9}$    |
| M8        | L1          | 37                        | F34 <sup>5</sup>  | "                       |
| M9        | R1          | 65                        | F32 <sup>6</sup>  | $1.2 \times 10^{-8}$    |
| M10       | L1          | 45                        | D5 <sup>7</sup>   | $3.3 \times 10^{-10}$   |
| "         | R1          | 15                        | D6                |                         |
| M11       | L1          | 60                        | F32 <sup>6</sup>  | $1.2 \times 10^{-8}$    |
| "         | L2          | 83                        | F30 <sup>3</sup>  | $4.3 \times 10^{-10}$   |
| "         | R1          | 90                        | F32 <sup>6</sup>  | $1.2 \times 10^{-8}$    |
| "         | R2          | 50                        | F32 <sup>6</sup>  | "                       |
| M12       | L1          | 48                        | D5 <sup>7</sup>   | $3.3 \times 10^{-10}$   |
| "         | L2          | 55                        | D4 <sup>4</sup>   | $1.7 \times 10^{-10}$   |
| "         | R1          | 39                        | D7                |                         |
| M13       | L1          | 61                        | F42 <sup>8</sup>  | $2.1 \times 10^{-10}$   |
| "         | R1          | 41                        | F50 <sup>9</sup>  | $7.1 \times 10^{-13}$   |
| "         | R2          | 41                        | F49 <sup>10</sup> | $5.7 \times 10^{-10}$   |
| M14       | R1          | 40                        | F50 <sup>9</sup>  | $7.1 \times 10^{-13}$   |

Continued

| Male I.D. | Egg cluster | No. of progeny<br>in cluster | Deduced<br>dam I.D. | Probability of<br>identity |
|-----------|-------------|------------------------------|---------------------|----------------------------|
| M15       | L1          | 70                           | F49 <sup>10</sup>   | $5.7 \times 10^{-10}$      |
| "         | L2          | 50                           | F42 <sup>8</sup>    | $2.1 \times 10^{-10}$      |
| M16       | L1          | 69                           | D8 <sup>11</sup>    | $1.4 \times 10^{-8}$       |
| M17       | L1          | 95                           | F48                 | $2.9 \times 10^{-6}$       |
| "         | L2          | 77                           | F48                 | "                          |
| "         | R1          | 58                           | F45                 | $1.3 \times 10^{-10}$      |
| "         | R2          | 58                           | F42 <sup>8</sup>    | $2.1 \times 10^{-10}$      |
| "         | R3          | 76                           | F50 <sup>9</sup>    | $7.1 \times 10^{-13}$      |
| M18       | L1          | 34                           | F50 <sup>9</sup>    | "                          |
| "         | L2          | 85                           | D8 <sup>11</sup>    | $1.4 \times 10^{-8}$       |
| "         | R1          | 33                           | F35                 | $1.0 \times 10^{-9}$       |
| "         | R2          | 24                           | F35                 | "                          |
| M19       | L1          | 58                           | D9                  | $1.2 \times 10^{-10}$      |
| "         | R1          | 78                           | D9                  | "                          |
| "         | R2          | 72                           | D8 <sup>11</sup>    | $1.4 \times 10^{-8}$       |
| M20       | L1          | 75                           | D53                 |                            |
| M21       | L1          | 93                           | D10 <sup>12</sup>   | $3.7 \times 10^{-11}$      |
| "         | L2          | 81                           | D11                 | $5.8 \times 10^{-10}$      |
| "         | L3          | 96                           | D11                 | "                          |
| "         | R1          | 48                           | D12 <sup>13</sup>   | $8.7 \times 10^{-9}$       |
| M22       | L1          | 45                           | D13 <sup>14</sup>   | $5.6 \times 10^{-13}$      |
| "         | L2          | 57                           | D13 <sup>14</sup>   | "                          |
| "         | R1          | 70                           | D14 <sup>15</sup>   | $1.4 \times 10^{-8}$       |
| M23       | L1          | 75                           | D12 <sup>13</sup>   | $8.7 \times 10^{-9}$       |
| "         | L2          | 56                           | D12 <sup>13</sup>   | "                          |
| "         | L3          | 117                          | F57                 | $6.4 \times 10^{-9}$       |
| "         | L4          | 110                          | D15                 | $3.3 \times 10^{-11}$      |
| "         | R1          | 70                           | D10 <sup>12</sup>   | $3.7 \times 10^{-11}$      |
| "         | R2          | 106                          | D16                 |                            |
| "         | R3          | 52                           | D15                 | $3.3 \times 10^{-11}$      |
| M24       | L1          | 58                           | D13 <sup>14</sup>   | $5.6 \times 10^{-13}$      |
| "         | L2          | 87                           | D17 <sup>16</sup>   | $3.8 \times 10^{-9}$       |
| "         | L3          | 55                           | D18 <sup>17</sup>   | $4.3 \times 10^{-8}$       |
| "         | R1          | 70                           | D13 <sup>14</sup>   | $5.6 \times 10^{-13}$      |
| "         | R2          | 56                           | D17 <sup>16</sup>   | $3.8 \times 10^{-9}$       |
| "         | R3          | 48                           | D13 <sup>14</sup>   | $5.6 \times 10^{-13}$      |
| "         | R4          | 65                           | D14 <sup>15</sup>   | $1.4 \times 10^{-8}$       |

Continued

| Male I.D | Egg cluster | No. of progeny<br>in cluster | Deduced<br>dam I.D. | Probability of<br>identity |
|----------|-------------|------------------------------|---------------------|----------------------------|
| M25      | L1          | 33                           | D14 <sup>15</sup>   | $1.4 \times 10^{-8}$       |
| "        | L2          | 38                           | D18 <sup>17</sup>   | $4.3 \times 10^{-8}$       |
| "        | L3          | 51                           | D18 <sup>17</sup>   | "                          |
| "        | R1          | 80                           | D19                 |                            |
| "        | R2          | 56                           | D13 <sup>14</sup>   | $5.6 \times 10^{-13}$      |
| "        | R3          | 53                           | D17 <sup>16</sup>   | $3.8 \times 10^{-9}$       |
| M26      | L1          | 105                          | D14 <sup>15</sup>   | $1.4 \times 10^{-8}$       |
| "        | L2          | 172                          | D20                 | $2.8 \times 10^{-11}$      |
| "        | L3          | 84                           | D20                 | "                          |
| "        | R1          | 63                           | D14 <sup>15</sup>   | $1.4 \times 10^{-8}$       |
| "        | R2          | 60                           | D18 <sup>17</sup>   | $4.3 \times 10^{-8}$       |
| "        | R3          | 60                           | D14 <sup>15</sup>   | $1.4 \times 10^{-8}$       |
| M27      | L1          | 70                           | D21 <sup>18</sup>   | $7.0 \times 10^{-10}$      |
| "        | L2          | 32                           | D21 <sup>18</sup>   | "                          |
| "        | R1          | 54                           | F114 <sup>19</sup>  | $1.7 \times 10^{-7}$       |
| M28      | L1          | 95                           | D21 <sup>18</sup>   | $7.0 \times 10^{-10}$      |
| "        | R1          | 49                           | F114 <sup>19</sup>  | $1.7 \times 10^{-7}$       |
| M29      | R1          | 78                           | D22                 |                            |
| M30      | L1          | 58                           | F116                | $2.9 \times 10^{-11}$      |
| M31      | L1          | 65                           | D23                 | $3.1 \times 10^{-9}$       |
| "        | L2          | 55                           | D23                 | "                          |
| "        | R1          | 35                           | F125                | $1.2 \times 10^{-9}$       |
| "        | R2          | 87                           | F125                | "                          |
| M32      | L1          | 38                           | D24                 |                            |
| "        | R1          | 53                           | D25                 |                            |
| M33      | L1          | 87                           | D26 <sup>20</sup>   | $8.4 \times 10^{-12}$      |
| "        | R1          | 80                           | D27                 |                            |
| "        | R2          | 72                           | D26 <sup>20</sup>   | $8.4 \times 10^{-12}$      |
| M34      | R1          | 32                           | D28                 |                            |
| M35      | L1          | 57                           | D26 <sup>20</sup>   | $8.4 \times 10^{-12}$      |
| "        | L2          | 59                           | D29                 |                            |
| "        | L3          | 72                           | D30                 |                            |
| "        | R1          | 22                           | D31                 | $4.8 \times 10^{-8}$       |
| "        | R2          | 99                           | D31                 | "                          |

Continued

| Male I.D. | Egg cluster | No. of progeny in cluster | Deduced dam I.D.  | Probability of identity |
|-----------|-------------|---------------------------|-------------------|-------------------------|
| M36       | L1          | 38                        | D34               | $1.1 \times 10^{-6}$    |
| "         | L2          | 94                        | D32 <sup>21</sup> | $1.2 \times 10^{-11}$   |
| "         | R1          | 60                        | D32 <sup>21</sup> | "                       |
| "         | R2          | 55                        | D33               |                         |
| "         | R3          | 76                        | D34               | $1.1 \times 10^{-6}$    |
| M37       | L1          | 55                        | D35               |                         |
| "         | L2          | 67                        | D36               |                         |
| "         | L3          | 59                        | D37               |                         |
| "         | L4          | 54                        | D26 <sup>20</sup> | $8.4 \times 10^{-12}$   |
| "         | L5          | 71                        | D38               |                         |
| "         | R1          | 43                        | D39               |                         |
| "         | R2          | 80                        | D32 <sup>21</sup> | $1.2 \times 10^{-11}$   |
| "         | R3          | 61                        | D40               |                         |
| "         | R4          | 61                        | D41               |                         |
| M38       | L1          | 34                        | D42               |                         |
| M39       | L1          | 155                       | D43               |                         |
| "         | R1          | 55                        | D44 <sup>22</sup> | $1.3 \times 10^{-5}$    |
| "         | R2          | 60                        | D45               |                         |
| M40       | L1          | 105                       | D44 <sup>22</sup> | $1.3 \times 10^{-5}$    |
| "         | R1          | 55                        | D49 <sup>23</sup> | $7.6 \times 10^{-12}$   |
| M41       | L1          | 78                        | D44 <sup>22</sup> | $1.3 \times 10^{-5}$    |
| M42       | L1          | 37                        | D46               |                         |
| "         | L2          | 63                        | D47               |                         |
| M43       | L1          | 39                        | D48               | $2.8 \times 10^{-9}$    |
| "         | L2          | 30                        | D50 <sup>24</sup> | $1.1 \times 10^{-12}$   |
| "         | L3          | 25                        | D48               | $2.8 \times 10^{-9}$    |
| "         | R1          | 52                        | D49 <sup>23</sup> | $7.6 \times 10^{-12}$   |
| M44       | L1          | 26                        | D49 <sup>23</sup> | "                       |
| "         | L2          | 39                        | F212              | $5.3 \times 10^{-11}$   |
| "         | L3          | 40                        | F212              | "                       |
| "         | L4          | 33                        | F212              | "                       |
| "         | R1          | 52                        | D49 <sup>23</sup> | $7.6 \times 10^{-12}$   |
| "         | R2          | 51                        | D51               |                         |
| "         | R3          | 24                        | D50 <sup>24</sup> | $1.1 \times 10^{-12}$   |
| "         | R4          | 69                        | D49 <sup>23</sup> | $7.6 \times 10^{-12}$   |
| "         | R5          | 62                        | D49 <sup>23</sup> | "                       |
| M45       | L1          | 38                        | D52               | $3.2 \times 10^{-11}$   |
